# Supplementary material for: Exon Skipping Through Chimeric Antisense U1 snRNAs to Correct Retinitis Pigmentosa GTPase-Regulator (RPGR) Splice Defect
Source: PubMed Central journal article supplement — Nucleic Acid Ther. 2022 Aug 4;32(4):333–49. doi: 10.1089/nat.2021.0053 (PMC9416563; doi:10.1089/nat.2021.0053), 2022-08-04
Supplement: Suppl_FigS2.pdf [file Suppl_FigS2.pdf]

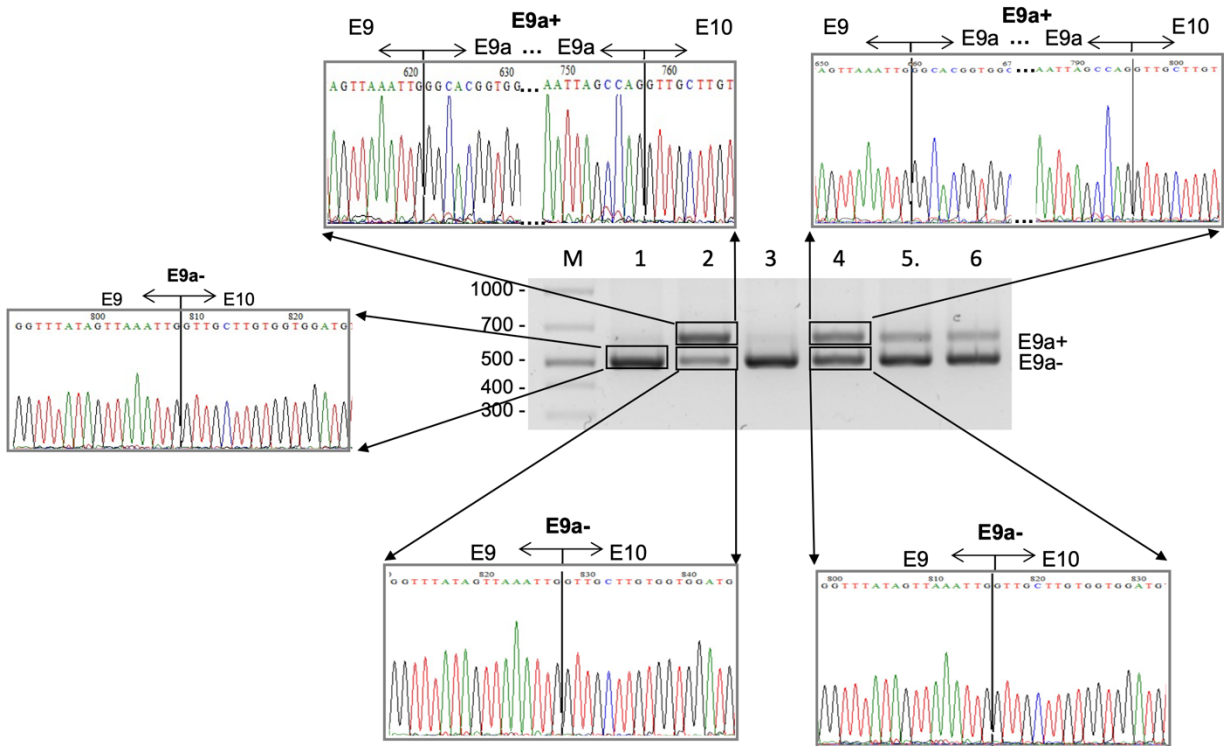

27  
28 **Supplemental Figure S2. Sequencing of amplicons in HEK-293T transfections.**

29 Semiquantitative RT-PCR of RNA from HEK-293T cells transfected with *RPGR* mutant minigene (MIN mut) alone or  
30 in combination with chimeric U1\_snRNAs plasmids (gel of Figure 4A). M: marker (sizes in base pairs indicated by  
31 numbers on the side). Lane 1: U1\_3'; Lane 2: U1\_5'; Lane 3: U1\_3'5'; Lane 4: U1\_3' + U1\_5'; Lane 5: U1\_Scramble;  
32 Lane 6: no U1 transfected. The E9a- band from lane 1 and both the E9a- and the E9a+ bands from lanes 2 and 4 were  
33 eluted and sequenced. The chromatograms indicate a correct fusion between exons 9 and 10 for the E9a- bands and that  
34 the upper E9a+ bands correspond to the retained exon 9a.

35  
36  
37
