# Supplementary material for: Exon Skipping Through Chimeric Antisense U1 snRNAs to Correct Retinitis Pigmentosa GTPase-Regulator (RPGR) Splice Defect
Source: PubMed Central journal article supplement — Nucleic Acid Ther. 2022 Aug 4;32(4):333–49. doi: 10.1089/nat.2021.0053 (PMC9416563; doi:10.1089/nat.2021.0053), 2022-08-04
Supplement: Suppl_FigS3.pdf [file Suppl_FigS3.pdf]

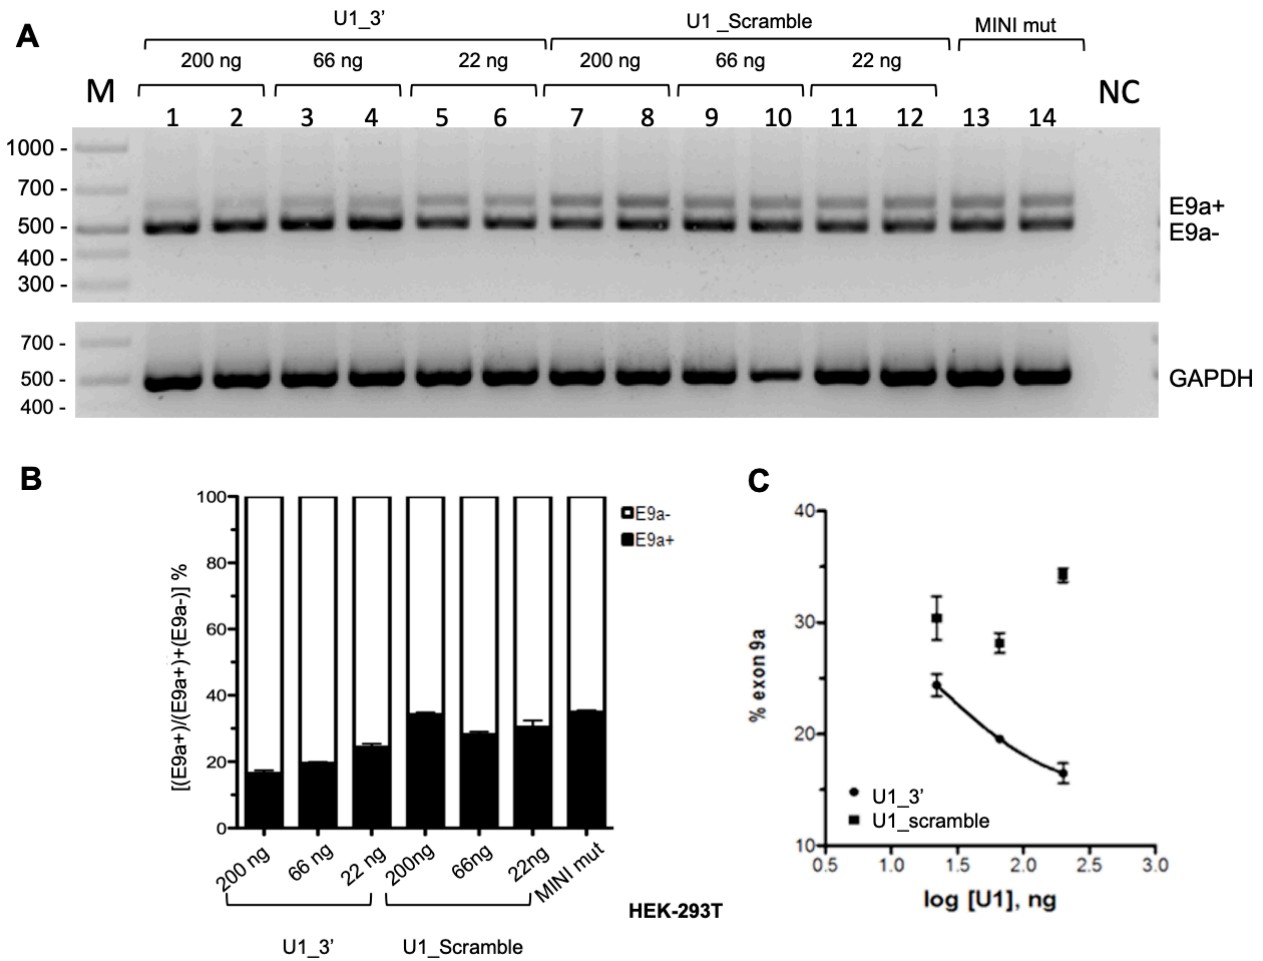

**Supplemental Figure S3**

42 **Supplemental Figure S3. Dose-dependent skipping effect of U1\_3' and U1\_Scramble.** (a) Semiquantitative RT-PCR  
 43 of *RPGR* minigene transcripts in HEK-293T cells co-transfected with the *RPGR* mutant minigene (MINI mut) with  
 44 different amounts of U1\_3' and U1\_Scramble plasmids (200, 66 and 20 ng). For each plasmid concentration, two  
 45 biological replicates were analysed and are shown. M: marker (sizes in base pairs indicated by numbers on the side). NC:  
 46 Negative Control (No-template control: no cDNA was included in the reaction). Lanes 1 and 2: HEK-293T cells  
 47 transfected with the mutated minigene (MINI mut) and 200 ng of construct U1\_3'; Lanes 3 and 4: HEK-293T cells  
 48 transfected with the mutated minigene (MINI mut) and 66 ng of construct U1\_3'; Lanes 5 and 6: HEK-293T cells  
 49 transfected with the mutated minigene (MINI mut) and 22 ng of construct U1\_3'; Lanes 7 and 8: HEK-293T cells  
 50 transfected with the mutated minigene (MINI mut) and 200 ng of construct U1\_Scramble ; Lanes 9 and 10: HEK-293T  
 51 cells transfected with the mutated minigene (MINI mut) and 66 ng of construct U1\_Scramble; Lanes 11 and 12: HEK-  
 52 293T cells transfected with the mutated minigene (MINI mut) and 22 ng of construct U1\_Scramble; Lanes 13 and 14:  
 53 HEK-293T cells transfected only with the mutated minigene (MINI mut). NT: Non-transfected: RNA extracted from  
 54 HEK-293T cells not transfected with any minigene nor U1 construct. (b) Densitometric analyses of the bands (n=2). (c)  
 55 Dose-response curve of U1\_3' and U1\_Scramble. Only data of U1\_3' dilutions fit a dose-response curve.
