# Supplementary material for: Exon Skipping Through Chimeric Antisense U1 snRNAs to Correct Retinitis Pigmentosa GTPase-Regulator (RPGR) Splice Defect
Source: PubMed Central journal article supplement — Nucleic Acid Ther. 2022 Aug 4;32(4):333–49. doi: 10.1089/nat.2021.0053 (PMC9416563; doi:10.1089/nat.2021.0053), 2022-08-04
Supplement: Suppl_FigS4.pdf [file Suppl_FigS4.pdf]

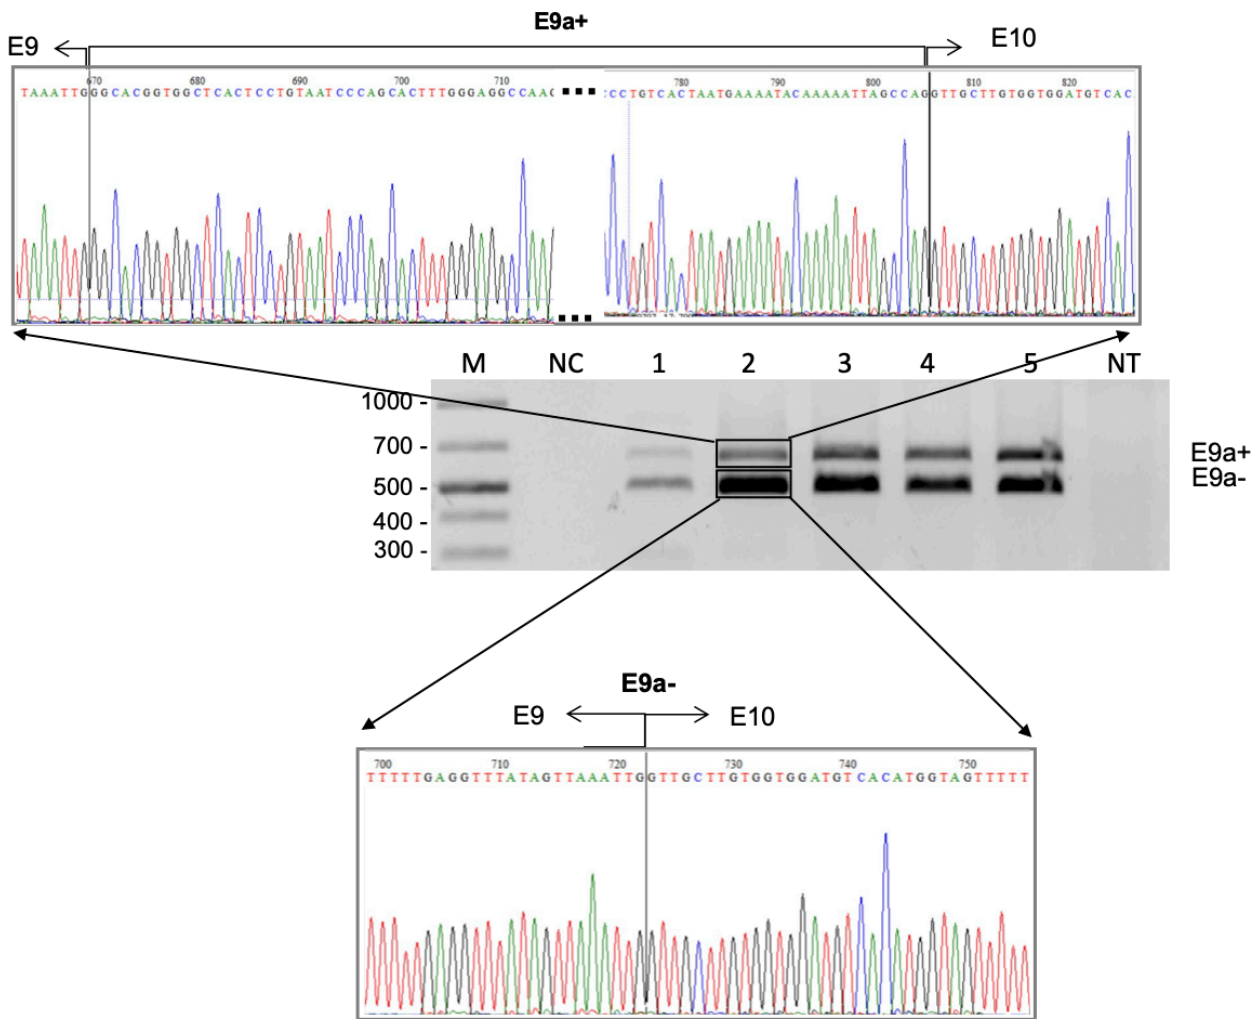

### Supplemental Figure S4

58

#### Supplemental Figure S4. Sequencing of amplicons in PC-12 transfections.

59 Semiquantitative RT-PCR of RNA from PC-12 cells transfected with *RPGR* mutant minigene (MIN mut) alone or in  
 60 combination with chimeric U1\_snRNAs plasmids (gel of Figure 4A). M: marker (sizes in base pairs indicated by numbers  
 61 on the side). NC: Negative Control (No-template control: no cDNA was included in the reaction). Lane 1: U1\_3'; Lane  
 62 2: U1\_5'; Lane 3: U1\_3'5'; Lane 4: U1\_Scramble; Lane 5: no U1 transfected. NT: Non-transfected: RNA extracted from  
 63 PC-12 cells not transfected with any minigene nor U1 construct. The E9a- and the E9a+ bands from lanes 2 were eluted  
 64 and sequenced. The chromatograms indicate that a correct fusion between exons 9 and 10 for the E9a- bands and that the  
 65 upper E9a+ bands correspond to the retained exon 9a.  
 66  
 67
