# Supplementary material for: Exon Skipping Through Chimeric Antisense U1 snRNAs to Correct Retinitis Pigmentosa GTPase-Regulator (RPGR) Splice Defect
Source: PubMed Central journal article supplement — Nucleic Acid Ther. 2022 Aug 4;32(4):333–49. doi: 10.1089/nat.2021.0053 (PMC9416563; doi:10.1089/nat.2021.0053), 2022-08-04
Supplement: Suppl_FigS5.pdf [file Suppl_FigS5.pdf]

A

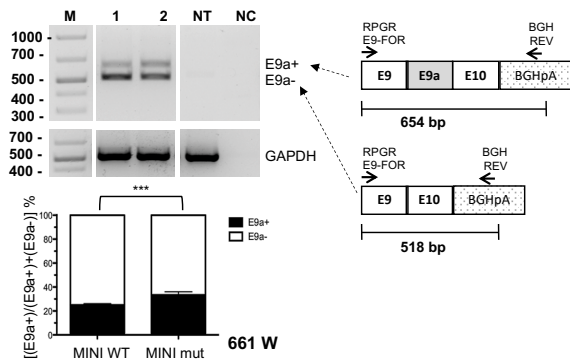

B

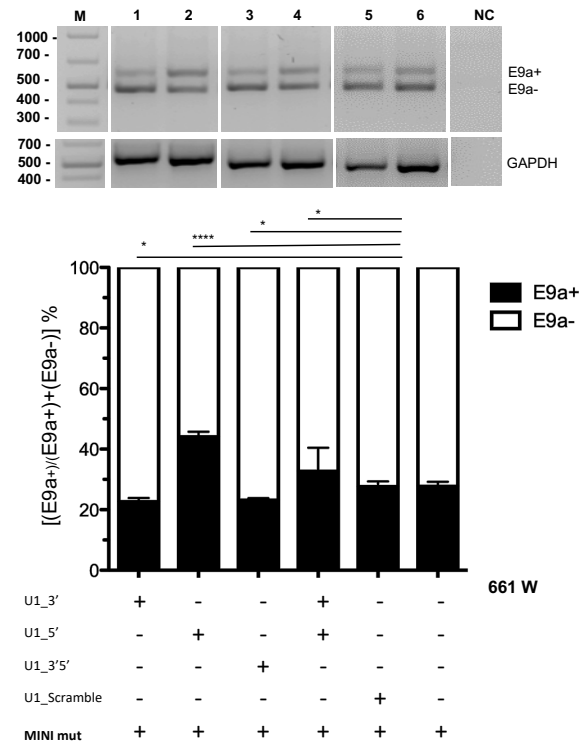

68  
69  
70  
71  
72  
73  
74  
75  
76  
77  
78  
79  
80  
81  
82  
83  
84  
85

**Supplemental Figure S5. Chimeric antisense U1 snRNA-induced exon 9a skipping in 66W1 cell lines transfected with *RPGR* mutant minigene.** (a) RT-PCR analysis of *RPGR* mRNA levels on RNA from 661W cells transfected with wild-type minigene (MINI wt, lane 1) and mutant minigene (MINI mut, lane 2). M: marker (sizes in base pairs indicated by numbers on the side). NT: Non-transfected: RNA extracted from 661W cells not transfected. NC: Negative Control (No-template control: no cDNA was included in the reaction). The analysis has been performed in triplicate, and one representative gel is shown. The histogram represents the densitometric analysis of the bands relative to the two different isoforms (E9a+ and E9a-) normalized to *GAPDH* ( $p < 0.001$ ). Data are shown as mean  $\pm$  S.D (n=3). (b) Semi-quantitative RT-PCR of RNA from 661W cells transfected with *RPGR* mutant minigene (MINI mut) alone or in combination with chimeric U1 snRNAs. E9a reduction using U1\_3' or U1\_3'5' is significant ( $p < 0.01$ ) compared to U1\_Scramble. One representative gel of three and densitometric analysis of E9a+ and E9a- amplicons, from three independent experiments, are shown. M: marker (sizes in base pairs indicated by numbers on the side). NC: Negative Control (No-template control: no cDNA was included in the reaction). *GAPDH* is used as an internal control. Data are shown as mean  $\pm$  S.D (n=3). Statistical analysis was performed with a global statistical test and is reported in Supplemental Table S1 (p-value: \* $P < 0.05$ ; \*\*\* $P < 0.001$ ; \*\*\*\* $P < 0.0001$ ).
