# Supplementary material for: Exon Skipping Through Chimeric Antisense U1 snRNAs to Correct Retinitis Pigmentosa GTPase-Regulator (RPGR) Splice Defect
Source: PubMed Central journal article supplement — Nucleic Acid Ther. 2022 Aug 4;32(4):333–49. doi: 10.1089/nat.2021.0053 (PMC9416563; doi:10.1089/nat.2021.0053), 2022-08-04
Supplement: Suppl_FigS6.pdf [file Suppl_FigS6.pdf]

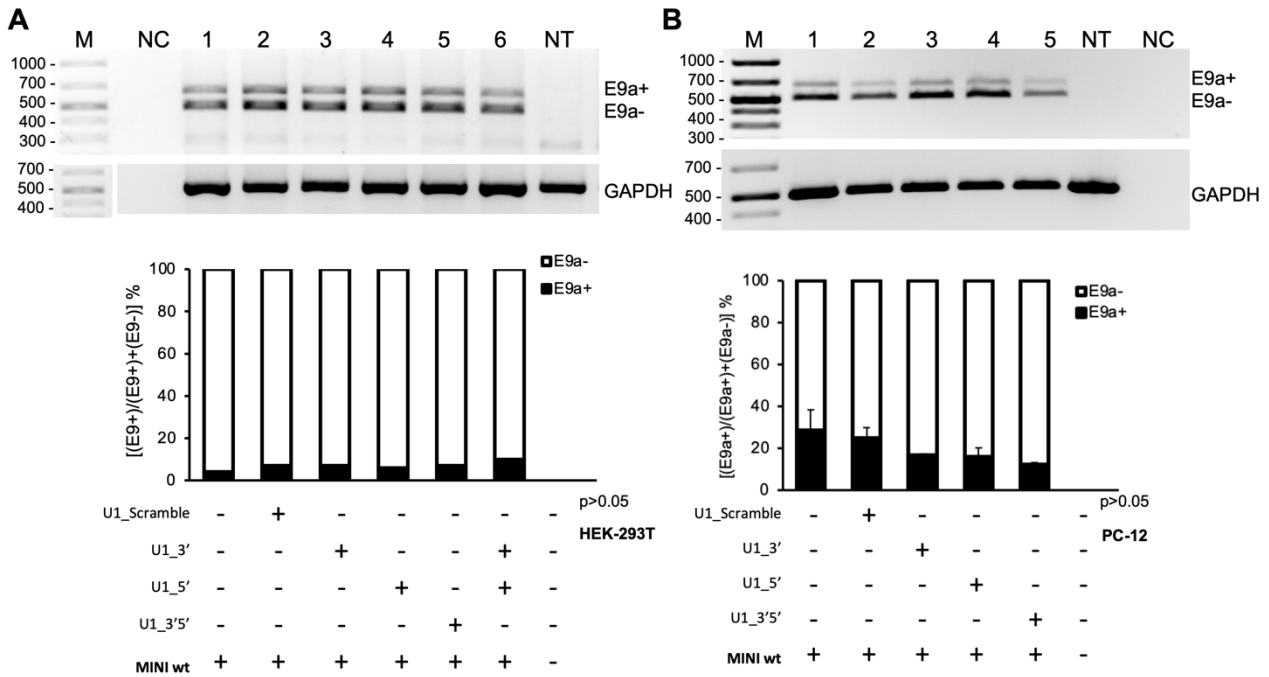

87

88

89

90

91

92

93

94

95

96

97

98

99

100

101

102

**Supplemental Figure S6. Co-transfection of *RPGR* MINI wt with U1 chimeric constructs.** (a) Semi-quantitative RT-PCR of RNA from HEK-293T cells transfected with *RPGR* wild-type minigene (MIN wt) alone or in combination with chimeric U1 snRNAs plasmids. M: marker (sizes in base pairs indicated by numbers on the side). NC: Negative Control (No-template control: no cDNA was included in the reaction). Lane 1: no U1 transfected, MINI wt transfected alone; Lane 2: U1\_Scramble; Lane 3: U1\_3'; Lane 4: U1\_5'; Lane 5: U1\_3'5'; Lane 6: U1\_3'+ U1\_5'; NT: Non-transfected: RNA extracted from PC-12 cells not transfected with any minigene nor U1 construct. (b) Semi-quantitative RT-PCR of RNA from PC-12 cells transfected with *RPGR* wild-type minigene (MINI wt) alone or in combination with chimeric U1 snRNAs. M: marker (sizes in base pairs indicated by numbers on the side). Lane 1: no U1 transfected, MINI wt transfected alone; Lane 2: U1\_Scramble; Lane 3: U1\_3'; Lane 4: U1\_5'; Lane 5: U1\_3'5'; NT: Non-transfected: RNA extracted from PC-12 cells not transfected with any minigene nor U1 construct. NC: Negative Control (No-template control: no cDNA was included in the reaction). One representative gel of three is shown in both (a) and (b). Densitometric analysis of E9a+ and E9a- amplicons, from three independent experiments, is shown for both cell lines, in the bottom panels. *GAPDH* is used as an internal control. Data are shown as mean  $\pm$  S.D (n=3).
