# Supplementary material for: Exon Skipping Through Chimeric Antisense U1 snRNAs to Correct Retinitis Pigmentosa GTPase-Regulator (RPGR) Splice Defect
Source: PubMed Central journal article supplement — Nucleic Acid Ther. 2022 Aug 4;32(4):333–49. doi: 10.1089/nat.2021.0053 (PMC9416563; doi:10.1089/nat.2021.0053), 2022-08-04
Supplement: Suppl_TableS1.pdf [file Suppl_TableS1.pdf]

103 **Supplemental Table**

104

105 **Table S.1. A global statistical test (GST) analysis carried out by Two-Way ANOVA (Bonferroni's) on**

106 **semiquantitative RT-PCR data.**

107

(p-value: \*P < 0.05; \*\*P < 0.01; \*\*\*P < 0.001; \*\*\*\*P < 0.0001)

| Samples                       | HEK-293T |              | PC-12   |              | 661W    |              |
|-------------------------------|----------|--------------|---------|--------------|---------|--------------|
|                               | p-value  | Significance | p-value | Significance | p-value | Significance |
| U1_3' vs. U1_Scramble         | 0.00322  | **           | <0.0001 | ****         | 0.0121  | *            |
| U1_3' vs. MINI mut            | 0.00499  | **           | <0.0001 | ****         | 0.0107  | *            |
| U1_3' vs. U1_5'               | <0.0001  | ****         | 0.0002  | ***          | <0.0001 | ****         |
| U1_3' vs. U1_3'5'             | 0.9999   | 0.9999       | <0.0001 | ****         | 0.9999  | 0.9999       |
| U1_5' vs. U1_Scramble         | <0.0001  | ****         | <0.0001 | ****         | <0.0001 | ****         |
| U1_5' vs. MINI mut            | <0.0001  | ****         | <0.0001 | ****         | <0.0001 | ****         |
| U1_5' vs. U1_3'5'             | <0.0001  | ****         | <0.0001 | ****         | <0.0001 | ****         |
| U1_3'5' vs. U1_Scramble       | 0.00925  | **           | <0.0001 | ****         | 0.0144  | *            |
| U1_3'5' vs. MINI mut          | 0.00576  | **           | <0.0001 | ****         | 0.0127  | *            |
| U1_Scramble vs. MINI mut      | 0.9999   | 0.9999       | 0.1012  | 0.1012       | 0.9999  | 0.9999       |
| U1 3' + U1 5' vs. U1_Scramble | 0.0056   | **           |         |              | 0.0072  | *            |
| U1 3' + U1 5' vs. MINI mut    | 0.0091   | **           |         |              | 0.0081  | *            |
| U1 3' + U1 5' vs. U1_5'       | 0.1383   | 0.1383       |         |              | 0.0025  | **           |
| U1 3' + U1 5' vs. U1_3'       | <0.0001  | ****         |         |              | 0.0001  | ***          |
| U1 3' + U1 5' vs. U1_3'5'     | <0,0001  | ****         |         |              | 0.0002  | ***          |

108
